# Supplementary material for: Dietary Histidine, Threonine, or Taurine Supplementation Affects Gilthead Seabream (Sparus aurata) Immune Status
Source: MDPI journal article supplement (doi:10.3390/ani11051193), 2021-04-21
Supplement: s1 [file s1]

## **Supplementary Files**

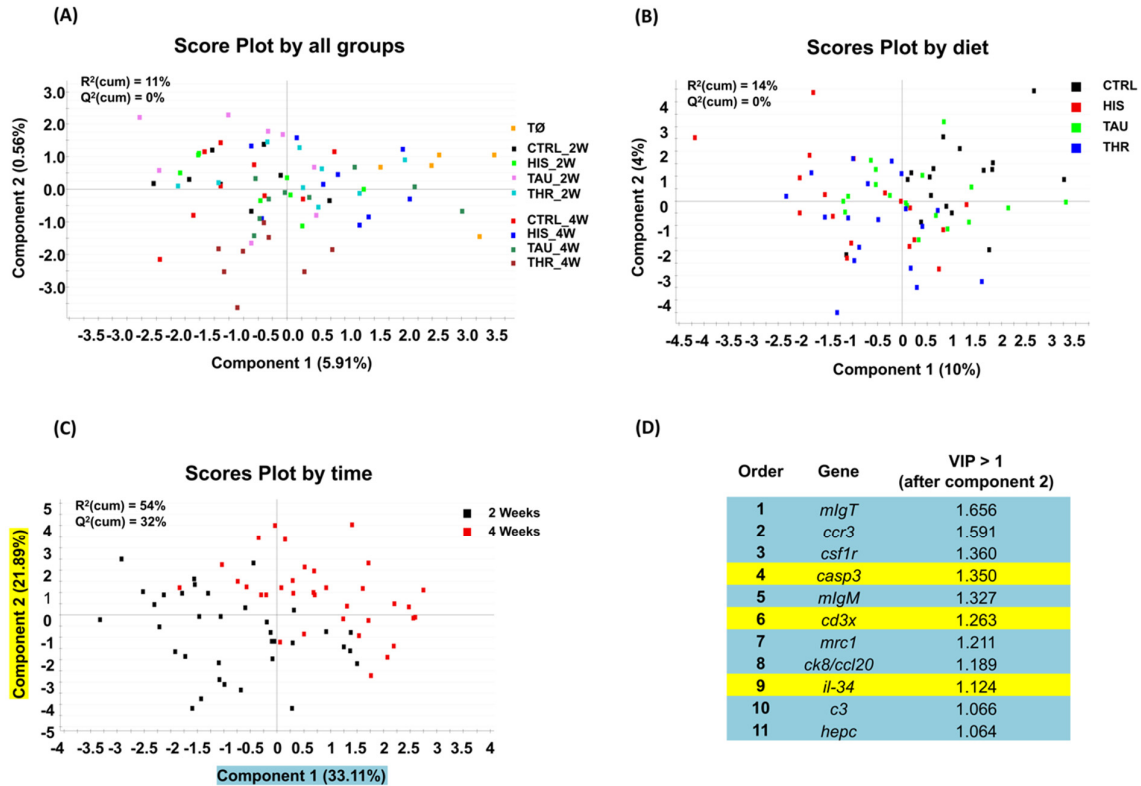

**Figure S1.** Discriminant analysis (PLS-DA) of head-kidney molecular signatures of fishes fed the experimental diets. Relative expression data of the 29 genes included in the array can be found on table 2. **(A)** PLS-DA scores plot of all biomarkers, using “experimental group” as target factor, for the two first components. **(B)** PLS-DA scores plot of all biomarkers, using “diet” as target factor, for the two first components. **(C)** PLS-DA scores plot of all biomarkers, using “time” as target factor, for the two first components. **(D)** Ordered list of markers by variable importance (VIP) in projection of PLS-DA model for time differentiation. Markers with VIP values > 1 after the first and second components are highlighted in blue and yellow, respectively.

**Table S1.** Forward (F) and reverse (R) primers used for real-time PCR in head kidney.

| Gene Name                                | Symbol           | Acc. No. |   | Primer sequences (5' → 3')     |
|------------------------------------------|------------------|----------|---|--------------------------------|
| β-actin                                  | <i>actb</i>      | X89920   | F | TCCTGCGGAATCCATGAGA            |
|                                          |                  |          | R | GACGTCGCACTTCATGATGCT          |
| C-C chemokineCK8 / C-C motifchemokine 20 | <i>ck8/ccl20</i> | GU181393 | F | CCGTCCTCATCTGCTTCATACT         |
|                                          |                  |          | R | GCTCTGCCGTTGATGGAAC            |
| Caspase                                  | <i>casp3</i>     | EU722334 | F | GCCAACGGACCTGGACCTG            |
|                                          |                  |          | R | CCATCGCCTCTCCTCGCATCTA         |
| C-C chemokine receptor type 3            | <i>ccr3</i>      | KF857317 | F | CTACATCAGCATCACCATACGCATCCT    |
|                                          |                  |          | R | TGGCACGGCACTTCTCCTTCA          |
| CD4-full                                 | <i>cd4-full</i>  | AM489485 | F | TCCTCCTCCTCGTCCTCGTT           |
|                                          |                  |          | R | GGTGTCTCATCTTCCGCTGTCT         |
| Cluster of differentiation 3 zeta chain  | <i>cd3z</i>      | MF175235 | F | ATGGCGGTCCAGACGAGGGTTTC        |
|                                          |                  |          | R | ACCAGCGAGGACAGGACCAGCAG        |
| Cluster of differentiation 8 alpha       | <i>cd8a</i>      | EU921630 | F | GCAGCAACGGTAACACGAACG          |
|                                          |                  |          | R | CCAGTATGAGCGGAGTACAGAACA       |
| Cluster of differentiation 8 beta        | <i>cd8b</i>      | KX231275 | F | CCGAAATGTGGAAGACTGGAATC        |
|                                          |                  |          | R | CCAGTATGAGCGGAGTACAGAACA       |
| Complement factor 3                      | <i>c3</i>        | HM543456 | F | GCTTACGCTCTTCTTGCTCTGGTGAA     |
|                                          |                  |          | R | CATCTGACAACTGGTCTGGCATCGT      |
| C-type lectin domain family 10 member A  | <i>clec10a</i>   | KF857329 | F | CGACTCTGGACTCCCTCA             |
|                                          |                  |          | R | CGTTGTTGATGGTGCCTTC            |
| Hepcidin                                 | <i>hepc</i>      | AM749960 | F | ACTCCTGGAAGATGCCGTATGC         |
|                                          |                  |          | R | AACTTACACCTCCTGCGTCCAC         |
| Immunoglobulin M                         | <i>igm</i>       | JQ811851 | F | ACCTCAGCGTCCTTCAGTGTTTATGATGCC |
|                                          |                  |          | R | CAGCGTCGTCGTCAACAAGCCAAGC      |
| Immunoglobulin M membrane-bound form     | <i>migm</i>      | KX599199 | F | GCTATGGAGGCGGAGGAAGATAACA      |
|                                          |                  |          | R | CAGCGTCGTCGTCAACAAGCCAAGC      |
| Immunoglobulin T                         | <i>igt</i>       | KX599200 | F | GCTGTCAAGGTGGCCCCAAAAG         |
|                                          |                  |          | R | CAACATTCATGCGAGTTACCCTTGCC     |
| Immunoglobulin T membrane-bound form     | <i>igt-m</i>     | KX599201 | F | AGACGATGCCAGTGAAGAGGATGAGT     |
|                                          |                  |          | R | CGAAGGAGGAGGCTGTGGACCA         |

|                                                   |                                |          |   |                              |
|---------------------------------------------------|--------------------------------|----------|---|------------------------------|
| Interleukin-1 beta                                | <i>il-1<math>\beta</math></i>  | AJ419178 | F | GCGACCTACCTGCCACCTACACC      |
|                                                   |                                |          | R | TCGTCCACCGCCTCCAGATGC        |
| Interleukin-6                                     | <i>il-6</i>                    | EU244588 | F | TCTTGAAGGTGGTGTGCTGGAAGTG    |
|                                                   |                                |          | R | AAGGACAATCTGCTGGAAGTGAGG     |
| Interleukin-7                                     | <i>il-7</i>                    | JX976618 | F | CTATCTCTGTCCCTGTCCTGTGA      |
|                                                   |                                |          | R | TGCGGATGGTTGCCTTGTAAT        |
| Interleukin-8                                     | <i>il-8</i>                    | JX976619 | F | CAGCAGAGTCTTCATCGTCACTATTG   |
|                                                   |                                |          | R | AGGCTCGCTTCACTGATGG          |
| Interleukin-10                                    | <i>il-10</i>                   | JX976621 | F | AACATCCTGGGCTTCTATCTG        |
|                                                   |                                |          | R | GTGTCCTCCGTCTCATCTG          |
| Interleukin 12 subunit beta                       | <i>il12</i>                    | JX976624 | F | ATTCCCTGTGTGGTGGCTGCT        |
|                                                   |                                |          | R | GCTGGCATCCTGGCACTGAAT        |
| Interleukin-15                                    | <i>il-15</i>                   | JX976625 | F | GAGACCAGCGAGCGAAAGGCATCC     |
|                                                   |                                |          | R | GCCAGAACAGGTTACAGGTTGACAGGAA |
| Interleukin-34                                    | <i>il-34</i>                   | JX976629 | F | TCTGTCTGCCTGCTGGTAG          |
|                                                   |                                |          | R | ATGCTGGCTGGTGTCTGG           |
| Macrophage colony-stimulating factor 1 receptor 1 | <i>csf1r1</i>                  | AM050293 | F | TTGCGTGTGGTGAGGAAGGAAGGT     |
|                                                   |                                |          | R | AGCAGGCAGGGCAGCAGGTA         |
| Macrophage mannose receptor 1                     | <i>mrc1</i>                    | KF857326 | F | CTTCCGACCGTACCTGTACCTACTCA   |
|                                                   |                                |          | R | CGATTCCAGCCTTCCGCACACTTA     |
| Toll-like receptor 2                              | <i>tlr2</i>                    | KF857323 | F | CATCTGCGACTCTCCTCTCTTCCT     |
|                                                   |                                |          | R | GCGTGGATAGAGTTGGACTTGAG      |
| Toll-like receptor 5                              | <i>tlr5</i>                    | KF857324 | F | TCGCCAATCTGACGGACCTGAG       |
|                                                   |                                |          | R | CAGAACGCCGATGTGGTTGTAAGAC    |
| Toll-like receptor 9                              | <i>tlr9</i>                    | AY751797 | F | GCCTTCCTTGTCTGCTCTTTCT       |
|                                                   |                                |          | R | GCCGTAGAGGTGCTTCAGTAG        |
| Tumor necrosis factor-alpha                       | <i>tnf-<math>\alpha</math></i> | AJ413189 | F | CAGGCGTCGTTCAAGTCTC          |
|                                                   |                                |          | R | CTGTGGCTGAGAGCTGTGAG         |
| Zeta-chain-associated protein kinase 70           | <i>zap70</i>                   | MF175239 | F | TGGTGAAGGAGGAGATGATGAGG      |
|                                                   |                                |          | R | GCGAACGATGTAGCGGTTGT         |

---

**Table S2.** Head kidney expression in response in gilthead seabream at time 0 and fed dietary treatments for 2 weeks and 4 weeks. All values are reported as mean  $\pm$  SE (n=9) (Raw data). P-values from two-way ANOVA ( $p \leq 0.05$ ). Tukey post-hoc test was used to identify differences in the experimental treatments. Different lowercase letters stand for significant differences between dietary treatments for the same time.

| Biological Process                   | Gene symbol                    | T0                 | 2 weeks            |                    |                    |                    | 4 weeks                       |                               |                              |                               | Two-way ANOVA ( $p < 0.05$ ) |       |             |
|--------------------------------------|--------------------------------|--------------------|--------------------|--------------------|--------------------|--------------------|-------------------------------|-------------------------------|------------------------------|-------------------------------|------------------------------|-------|-------------|
|                                      |                                | CTRL               | CTRL               | THR                | TAU                | HIS                | CTRL                          | THR                           | TAU                          | HIS                           | Time                         | Diet  | Time x diet |
| Interleukins & Cytokines             | <i>il-1<math>\beta</math></i>  | 0.08 $\pm$ 0.01    | 0.07 $\pm$ 0.01    | 0.10 $\pm$ 0.03    | 0.07 $\pm$ 0.01    | 0.05 $\pm$ 0.00    | 0.10 $\pm$ 0.03               | 0.07 $\pm$ 0.01               | 0.09 $\pm$ 0.02              | 0.10 $\pm$ 0.01               | 0.086                        | 0.374 | 0.735       |
|                                      | <i>il-6</i>                    | 0.04 $\pm$ 0.01    | 0.08 $\pm$ 0.02    | 0.06 $\pm$ 0.02    | 0.08 $\pm$ 0.01    | 0.04 $\pm$ 0.01    | 0.05 $\pm$ 0.01               | 0.05 $\pm$ 0.01               | 0.06 $\pm$ 0.01              | 0.05 $\pm$ 0.01               | 0.584                        | 0.208 | 0.589       |
|                                      | <i>il-7</i>                    | 1.06 $\pm$ 0.11    | 1.37 $\pm$ 0.16    | 1.14 $\pm$ 0.14    | 1.30 $\pm$ 0.21    | 1.07 $\pm$ 0.10    | 1.16 $\pm$ 0.09               | 1.14 $\pm$ 0.13               | 1.31 $\pm$ 0.14              | 1.08 $\pm$ 0.12               | 0.797                        | 0.433 | 0.836       |
|                                      | <i>il-8</i>                    | 0.07 $\pm$ 0.01    | 0.09 $\pm$ 0.01    | 0.08 $\pm$ 0.02    | 0.09 $\pm$ 0.01    | 0.08 $\pm$ 0.01    | 0.10 $\pm$ 0.02               | 0.08 $\pm$ 0.02               | 0.07 $\pm$ 0.01              | 0.08 $\pm$ 0.02               | 0.732                        | 0.533 | 0.883       |
|                                      | <i>il-10</i>                   | 0.69 $\pm$ 0.08    | 0.57 $\pm$ 0.04    | 0.68 $\pm$ 0.08    | 0.67 $\pm$ 0.07    | 0.61 $\pm$ 0.06    | 0.66 $\pm$ 0.03               | 0.62 $\pm$ 0.05               | 0.65 $\pm$ 0.06              | 0.69 $\pm$ 0.06               | 0.345                        | 0.984 | 0.62        |
|                                      | <i>il-12</i>                   | 0.09 $\pm$ 0.02    | 0.07 $\pm$ 0.01    | 0.05 $\pm$ 0.00    | 0.06 $\pm$ 0.01    | 0.06 $\pm$ 0.01    | 0.06 $\pm$ 0.01               | 0.05 $\pm$ 0.01               | 0.07 $\pm$ 0.02              | 0.06 $\pm$ 0.01               | 0.706                        | 0.457 | 0.982       |
|                                      | <i>il-15</i>                   | 0.25 $\pm$ 0.03    | 0.29 $\pm$ 0.04    | 0.26 $\pm$ 0.02    | 0.30 $\pm$ 0.03    | 0.28 $\pm$ 0.03    | 0.30 $\pm$ 0.02               | 0.28 $\pm$ 0.04               | 0.26 $\pm$ 0.03              | 0.27 $\pm$ 0.03               | 0.504                        | 0.493 | 0.695       |
|                                      | <i>il-34</i>                   | 1.57 $\pm$ 0.15    | 1.78 $\pm$ 0.12    | 1.76 $\pm$ 0.24    | 1.54 $\pm$ 0.10    | 1.37 $\pm$ 0.11    | 1.57 $\pm$ 0.13               | 1.39 $\pm$ 0.09               | 1.66 $\pm$ 0.07              | 1.66 $\pm$ 0.15               | 0.909                        | 0.092 | 0.173       |
|                                      | <i>tnf-<math>\alpha</math></i> | 0.25 $\pm$ 0.03    | 0.27 $\pm$ 0.03    | 0.24 $\pm$ 0.02    | 0.26 $\pm$ 0.02    | 0.24 $\pm$ 0.02    | 0.26 $\pm$ 0.01               | 0.22 $\pm$ 0.02               | 0.22 $\pm$ 0.01              | 0.23 $\pm$ 0.02               | 0.175                        | 0.66  | 0.806       |
| Macrophages and monocytes chemokines | <i>csf1r1</i>                  | 4.30 $\pm$ 0.35    | 4.65 $\pm$ 0.39    | 4.40 $\pm$ 0.36    | 4.94 $\pm$ 0.48    | 4.48 $\pm$ 0.29    | 4.34 $\pm$ 0.32               | 4.09 $\pm$ 0.32               | 3.74 $\pm$ 0.14              | 4.59 $\pm$ 0.36               | 0.127                        | 0.449 | 0.458       |
|                                      | <i>ccr3</i>                    | 4.86 $\pm$ 0.55    | 5.94 $\pm$ 0.49    | 5.44 $\pm$ 0.40    | 5.17 $\pm$ 0.59    | 4.60 $\pm$ 0.40    | 5.71 $\pm$ 0.22               | 5.77 $\pm$ 0.25               | 5.83 $\pm$ 0.41              | 5.72 $\pm$ 0.49               | 0.094                        | 0.038 | 0.548       |
|                                      | <i>ck8/ccl20</i>               | 0.76 $\pm$ 0.06    | 0.72 $\pm$ 0.08    | 0.81 $\pm$ 0.09    | 0.81 $\pm$ 0.06    | 0.74 $\pm$ 0.07    | 0.82 $\pm$ 0.07               | 0.78 $\pm$ 0.06               | 0.93 $\pm$ 0.11              | 0.84 $\pm$ 0.07               | 0.114                        | 0.713 | 0.738       |
| Immunoglobulins                      | <i>slgM</i>                    | 185.25 $\pm$ 27.90 | 188.57 $\pm$ 10.54 | 243.04 $\pm$ 28.52 | 225.26 $\pm$ 13.57 | 255.46 $\pm$ 23.91 | 223.21 $\pm$ 29.19            | 266.64 $\pm$ 25.54            | 249.75 $\pm$ 17.01           | 237.76 $\pm$ 13.26            | 0.224                        | 0.23  | 0.817       |
|                                      | <i>IgM-m</i>                   | 34.45 $\pm$ 3.82   | 25.76 $\pm$ 1.35   | 27.40 $\pm$ 1.86   | 32.16 $\pm$ 3.05   | 25.05 $\pm$ 1.39   | 31.24 $\pm$ 1.22              | 30.43 $\pm$ 2.00              | 29.85 $\pm$ 1.54             | 31.99 $\pm$ 2.74              | 0.03                         | 0.579 | 0.283       |
|                                      | <i>slgT</i>                    | 0.28 $\pm$ 0.12    | 0.24 $\pm$ 0.15    | 0.07 $\pm$ 0.06    | 0.14 $\pm$ 0.09    | 0.24 $\pm$ 0.16    | 0.26 $\pm$ 0.13               | 0.82 $\pm$ 0.23               | 0.39 $\pm$ 0.16              | 0.17 $\pm$ 0.10               | 0.009                        | 0.827 | 0.416       |
|                                      | <i>IgT-m</i>                   | 6.67 $\pm$ 0.88    | 5.70 $\pm$ 0.81    | 6.62 $\pm$ 0.93    | 8.17 $\pm$ 1.76    | 8.21 $\pm$ 0.84    | 9.23 $\pm$ 1.74 <sup>ab</sup> | 11.54 $\pm$ 1.92 <sup>b</sup> | 5.16 $\pm$ 0.64 <sup>a</sup> | 8.37 $\pm$ 0.79 <sup>ab</sup> | 0.125                        | 0.408 | 0.013       |
| Complement factor                    | <i>c3</i>                      | 0.02 $\pm$ 0.01    | 0.03 $\pm$ 0.02    | 0.00 $\pm$ 0.00    | 0.01 $\pm$ 0.00    | 0.02 $\pm$ 0.02    | 0.04 $\pm$ 0.03               | 0.04 $\pm$ 0.03               | 0.02 $\pm$ 0.01              | 0.02 $\pm$ 0.01               | 0.118                        | 0.653 | 0.23        |
| Iron recycling                       | <i>hepc</i>                    | 15.00 $\pm$ 3.06   | 48.50 $\pm$ 9.73   | 49.69 $\pm$ 13.49  | 27.58 $\pm$ 4.61   | 43.92 $\pm$ 5.66   | 56.42 $\pm$ 9.67              | 53.29 $\pm$ 10.80             | 47.96 $\pm$ 11.24            | 45.01 $\pm$ 9.13              | 0.203                        | 0.294 | 0.755       |
| T-cell markers                       | <i>cd3x</i>                    | 3.97 $\pm$ 1.22    | 2.43 $\pm$ 0.13    | 2.46 $\pm$ 0.12    | 2.55 $\pm$ 0.22    | 2.70 $\pm$ 0.23    | 2.41 $\pm$ 0.11               | 2.23 $\pm$ 0.14               | 2.31 $\pm$ 0.17              | 2.50 $\pm$ 0.28               | 0.302                        | 0.714 | 0.955       |
|                                      | <i>cd4-full</i>                | 3.56 $\pm$ 1.41    | 1.97 $\pm$ 0.12    | 1.61 $\pm$ 0.05    | 1.77 $\pm$ 0.14    | 1.97 $\pm$ 0.15    | 1.94 $\pm$ 0.17               | 1.95 $\pm$ 0.14               | 1.86 $\pm$ 0.21              | 1.56 $\pm$ 0.20               | 0.762                        | 0.476 | 0.29        |

|                                          |                |             |                          |                          |                           |                           |             |             |             |             |       |       |        |
|------------------------------------------|----------------|-------------|--------------------------|--------------------------|---------------------------|---------------------------|-------------|-------------|-------------|-------------|-------|-------|--------|
|                                          | <i>cd8a</i>    | 4.28 ± 2.23 | 1.82 ± 0.25              | 1.69 ± 0.21              | 1.76 ± 0.17               | 1.73 ± 0.27               | 1.76 ± 0.17 | 1.78 ± 0.15 | 1.93 ± 0.17 | 1.96 ± 0.34 | 0.653 | 0.927 | 0.987  |
|                                          | <i>cd8b</i>    | 1.34 ± 0.81 | 0.47 ± 0.07              | 0.41 ± 0.05              | 0.42 ± 0.04               | 0.48 ± 0.10               | 0.44 ± 0.05 | 0.48 ± 0.07 | 0.57 ± 0.10 | 0.41 ± 0.08 | 0.776 | 0.58  | 0.697  |
|                                          | <i>zap70</i>   | 2.38 ± 0.44 | 1.83 ± 0.17              | 1.87 ± 0.10              | 1.95 ± 0.18               | 2.30 ± 0.30               | 2.05 ± 0.15 | 1.91 ± 0.17 | 1.67 ± 0.15 | 1.89 ± 0.21 | 0.472 | 0.427 | 0.422  |
| <b>Pattern recognition<br/>receptors</b> | <i>tlr2</i>    | 3.93 ± 0.33 | 3.55 ± 0.31              | 3.10 ± 0.19              | 3.52 ± 0.37               | 3.13 ± 0.19               | 3.37 ± 0.25 | 3.20 ± 0.18 | 2.94 ± 0.27 | 3.64 ± 0.27 | 0.845 | 0.449 | 0.282  |
|                                          | <i>tlr5</i>    | 0.35 ± 0.05 | 0.33 ± 0.02              | 0.36 ± 0.02              | 0.31 ± 0.01               | 0.34 ± 0.02               | 0.32 ± 0.02 | 0.37 ± 0.02 | 0.35 ± 0.01 | 0.38 ± 0.03 | 0.409 | 0.041 | 0.622  |
|                                          | <i>tlr9</i>    | 1.70 ± 0.21 | 0.86 ± 0.12              | 0.97 ± 0.07              | 1.05 ± 0.14               | 0.92 ± 0.10               | 0.97 ± 0.08 | 0.81 ± 0.05 | 1.00 ± 0.13 | 1.11 ± 0.09 | 0.676 | 0.696 | 0.22   |
|                                          | <i>mrc1</i>    | 6.34 ± 0.75 | 7.62 ± 0.22              | 7.75 ± 0.57              | 7.27 ± 0.53               | 7.38 ± 0.82               | 8.08 ± 0.43 | 7.33 ± 0.43 | 8.22 ± 0.51 | 8.32 ± 0.44 | 0.212 | 0.791 | 0.57   |
| <b>Caspase</b>                           | <i>casp3</i>   | 1.00 ± 0.06 | 1.02 ± 0.08              | 1.09 ± 0.07              | 1.11 ± 0.11               | 1.15 ± 0.08               | 1.04 ± 0.11 | 1.08 ± 0.09 | 0.99 ± 0.06 | 0.93 ± 0.09 | 0.252 | 0.709 | 0.762  |
| <b>Lectins</b>                           | <i>clec10a</i> | 0.54 ± 0.11 | 1.22 ± 0.14 <sup>b</sup> | 0.43 ± 0.05 <sup>a</sup> | 1.18 ± 0.09 <sup>ab</sup> | 0.83 ± 0.19 <sup>ab</sup> | 1.22 ± 0.25 | 1.33 ± 0.19 | 0.84 ± 0.17 | 0.83 ± 0.17 | 0.258 | 0.066 | <0.001 |
